# Supplementary material
Source: PubMed Central journal article supplement (PMC7357313)

## SUPPLEMENTARY MATERIALS

**Supplementary Table 1.** Summary of prior studies of ER-borderline breast cancers with intrinsic subtype reported.

| Study                     | ER-borderline definition            | ER-borderline with PAM50 available* | Basal-like n (%) | HER2-enriched n (%) | Luminal n (%) | Normal-like n (%) |
|---------------------------|-------------------------------------|-------------------------------------|------------------|---------------------|---------------|-------------------|
| Current study             | ER positivity $\geq$ 1% and < 10%   | n = 91                              | 38 (41.7)        | 13 (14.3)           | 40 (44.0)     | Excluded          |
| Sheffield et al. 2016 (1) | ER weakly positive (Allred 3, 4, 5) | n = 60                              | 30 (50.0)        | 24 (40.0)           | 6 (10.0)      | Not reported      |
| Cheang et al. 2016 (2)    | ER positivity 1% - 9%               | n = 65                              | 7 (10.8)         | 32 (49.2)           | 21 (32.3)     | 5 (7.7)           |
| Deyarmin et al. 2013 (3)  | ER positivity 1 - 10%               | n = 26                              | 16 (61.5)        | 7 (26.9)            | 3 (11.5)      | Excluded          |
| Iwamoto et al. 2012 (4)   | ER positivity 1 - 9%                | n = 25                              | 12 (48.0)        | 8 (32.0)            | 2 (8.0)       | 3 (12.0)          |
| Overall                   | -                                   | n = 267                             | 103 (38.6)       | 84 (31.5)           | 72 (27.0)     | -                 |

\*Includes HER2-negative and HER2-positive tumors.

**References**

1. Sheffield BS, Kos Z, Asleh-Aburaya K, et al. Molecular subtype profiling of invasive breast cancers weakly positive for estrogen receptor. *Breast Cancer Res Treat.* 2016;155(3):483-490. doi:10.1007/s10549-016-3689-z
2. Cheang MCU, Martin M, Nielsen TO, et al. Defining Breast Cancer Intrinsic Subtypes by Quantitative Receptor Expression. *Oncologist.* 2015;20(5):474-482. doi:10.1634/theoncologist.2014-0372
3. Deyarmin B, Kane JL, Valente AL, et al. Effect of ASCO/CAP Guidelines for Determining ER Status on Molecular Subtype. *Ann Surg Oncol.* 2013;20(1):87-93. doi:10.1245/s10434-012-2588-8
4. Iwamoto T, Booser D, Valero V, et al. Estrogen Receptor (ER) mRNA and ER-Related Gene Expression in Breast Cancers That Are 1% to 10% ER-Positive by Immunohistochemistry. *J Clin Oncol.* 2012;30(7):729-734. doi:10.1200/JCO.2011.36.2574

**Supplementary Figure 1.** Flow diagram of study population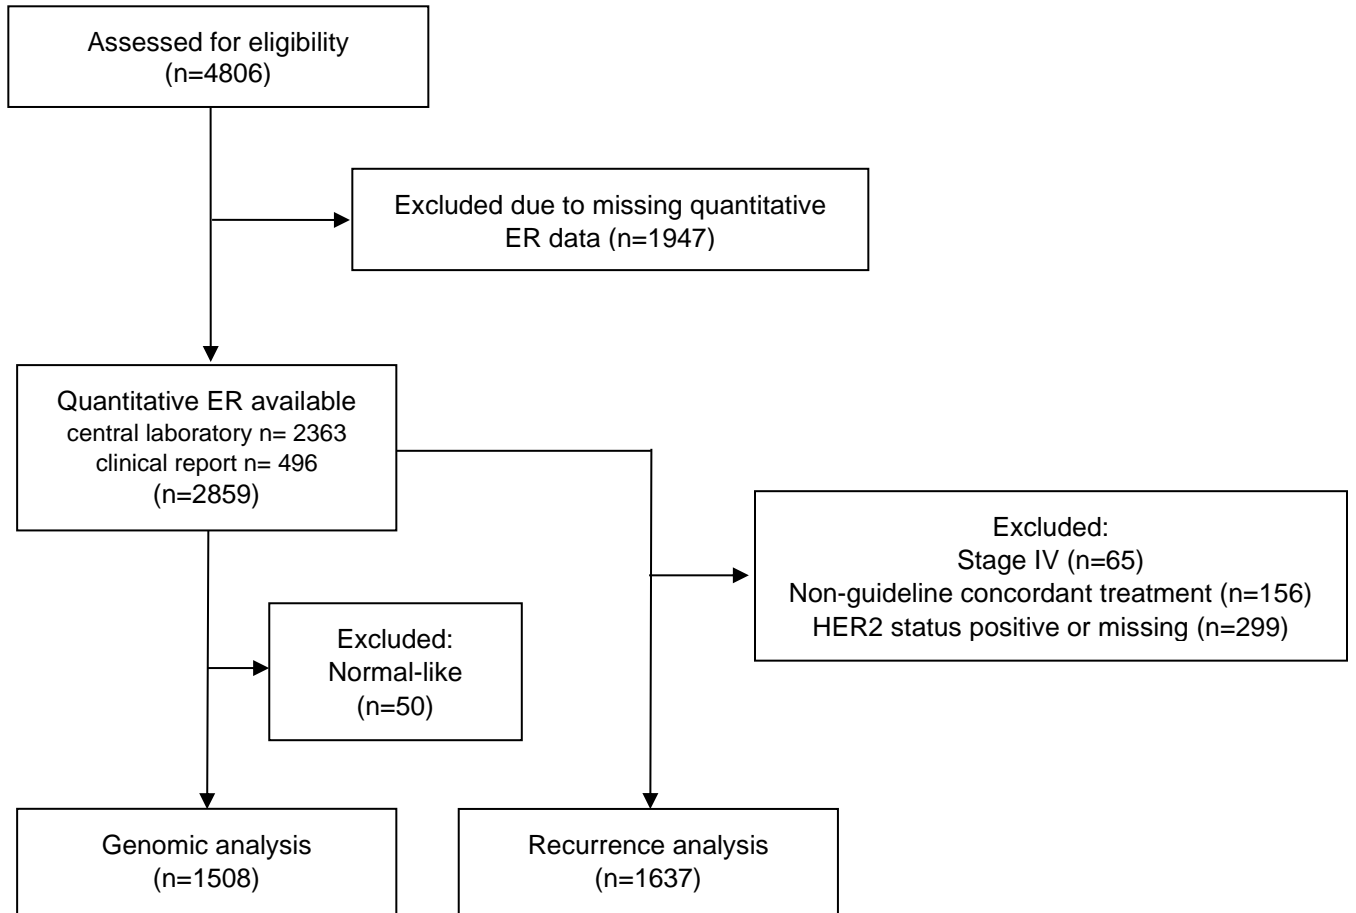

**Supplementary Figure 2.** ESR1 mRNA expression in estrogen receptor (ER) categories. Text on plot indicates median (interquartile range). Median ESR1 expression was statistically significantly different between ER-negative and ER-borderline (Kruskal-Wallis p-value < 0.001), between ER-positive and ER-borderline (Kruskal-Wallis p-value < 0.001), and between ER-negative and ER-positive (Kruskal-Wallis p-value < 0.001). All statistical tests were two-sided.

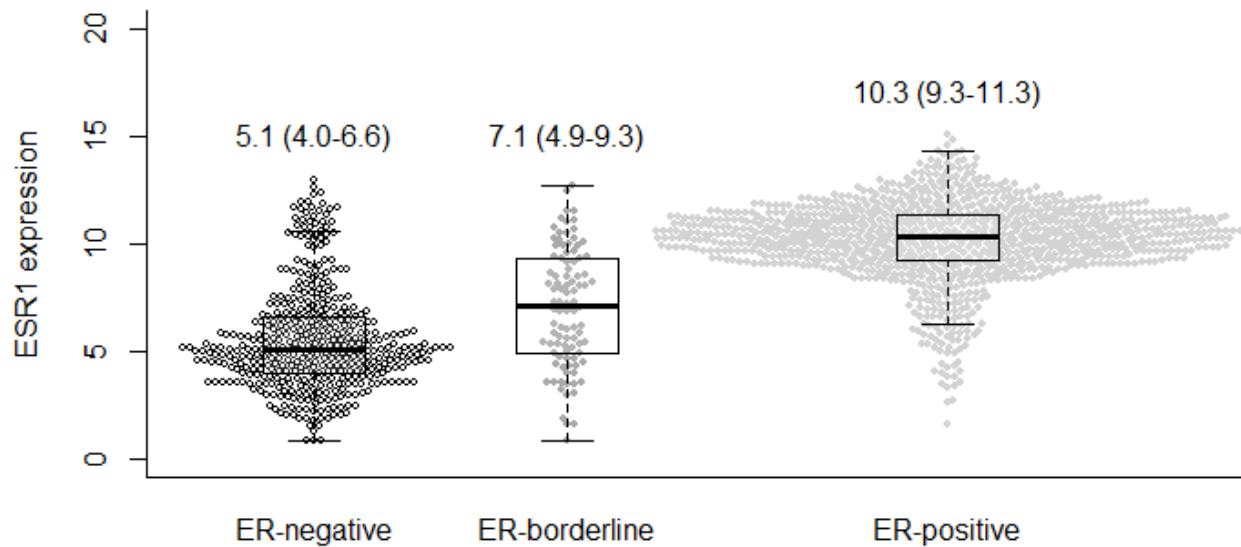

Supplement: djz206_supplementary_data.pdf [file djz206_supplementary_data.pdf]
